# Supplementary material for: A three-dimensional culture model of innervated human skeletal muscle enables studies of the adult neuromuscular junction and disease modeling
Source: bioRxiv or medRxiv preprint supplement (doi:10.1101/275545), 2018-11-26
Supplement: Supplementary file [file 275545-1.pdf]

## Supplemental Information

A 3D model of human skeletal muscle innervated with stem cell-derived motor neurons enables epsilon-subunit targeted myasthenic syndrome studies

Mohsen Afshar Bakooshli, Ethan S Lippmann, Ben Mulcahy, Nisha R Iyer, Christine T Nguyen, Kayee Tung, Bryan A Stewart, Vincent Mouly, Elena Pegoraro, Henry Ahn, Howard Ginsberg, Mei Zhen, Randolph S Ashton, Penney M Gilbert

Link to Supplemental Figures, Movies, and Tables

<https://www.dropbox.com/sh/rag55mzoledtb88/AACUc5IssyGcodYqvuD4YdiVa?dl=0>
